# Supplementary material for: New Eco-Friendly Synthesized Thermosets from Isoeugenol-Based Epoxy Resins
Source: PubMed Central journal article supplement (PMC7023557; doi:10.3390/polym12010229), 2020-01-17
Supplement: polymers-12-00229-s001.pdf [file polymers-12-00229-s001.pdf]

# New Eco-Friendly Synthesized Thermosets from Isoeugenol-Based Epoxy Resins

Quentin Ruiz <sup>1,2</sup>, Sylvie Pourchet <sup>1,\*</sup>, Vincent Placet <sup>2</sup>, Laurent Plasseraud <sup>1</sup> and Gilles Boni <sup>1,\*</sup>

<sup>1</sup> ICMUB Institute, Université de Bourgogne Franche-Comté, UMR 6302 CNRS-UB, F-21000 Dijon, France; quentin\_ruiz@etu.u-bourgogne.fr (Q.R.); laurent.plasseraud@u-bourgogne.fr (L.P.)

<sup>2</sup> FEMTO-ST Institute, Université de Bourgogne Franche-Comté, UMR 6174 CNRS-UFC-ENSMM-UTBM, Department of Applied Mechanics, F-25000 Besancon, France; vincent.placet@univ-fcomte.fr

\* Correspondence: sylvie.pourchet@u-bourgogne.fr (S.P.); gilles.boni@u-bourgogne.fr (G.B.)

**Figure S1.** <sup>1</sup>H NMR spectrum of BioIgenol (CDCl<sub>3</sub>)

**Figure S2.** <sup>13</sup>C{<sup>1</sup>H} NMR spectrum of BioIgenol (CDCl<sub>3</sub>)

**Figure S3.** <sup>1</sup>H NMR Spectrum of DiEP1 and DiEP2 (CDCl<sub>3</sub>)

**Figure S4.** <sup>13</sup>C{<sup>1</sup>H} NMR Spectrum of DiEP1 and DiEP2 (CDCl<sub>3</sub>)

**Figure S5.** <sup>1</sup>H NMR spectrum of BioIgenox (CDCl<sub>3</sub>)

**Figure S6.** <sup>13</sup>C{<sup>1</sup>H} NMR spectrum of BioIgenox (CDCl<sub>3</sub>)

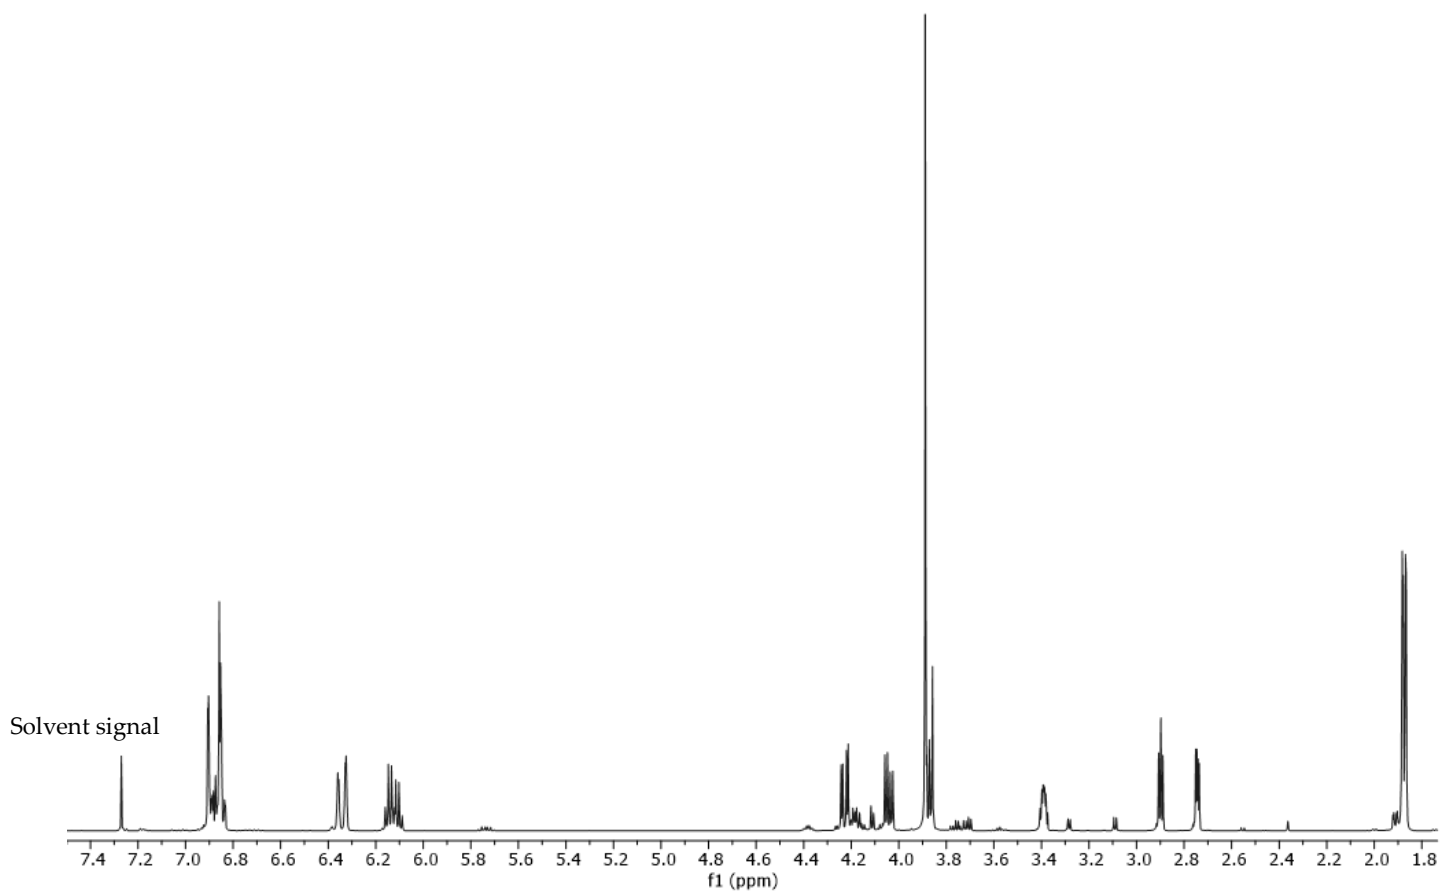

**Figure S1.**  $^1\text{H}$  NMR spectrum of BioIgenol ( $\text{CDCl}_3$ )

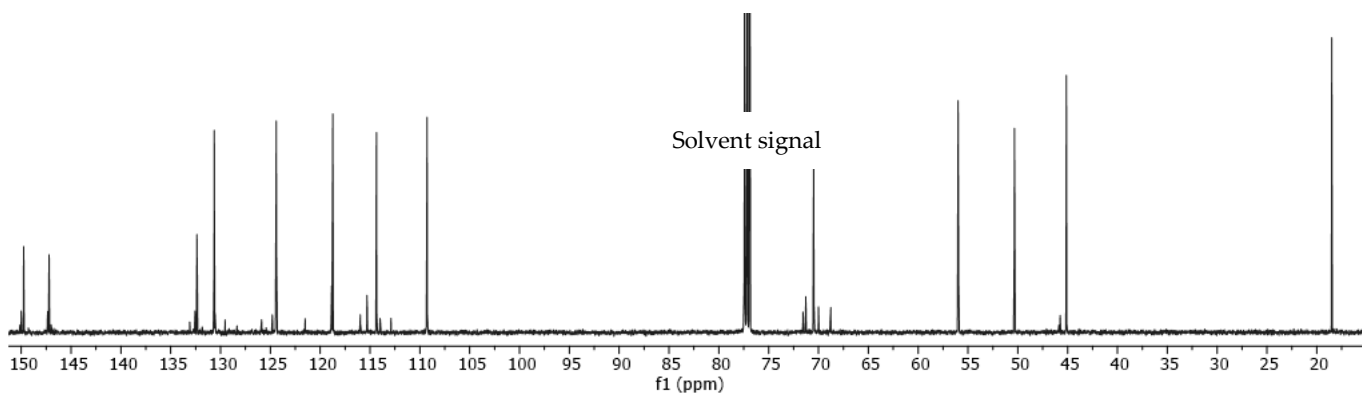

**Figure S2.**  $^{13}\text{C}\{^1\text{H}\}$  NMR spectrum of BioIgenol ( $\text{CDCl}_3$ )

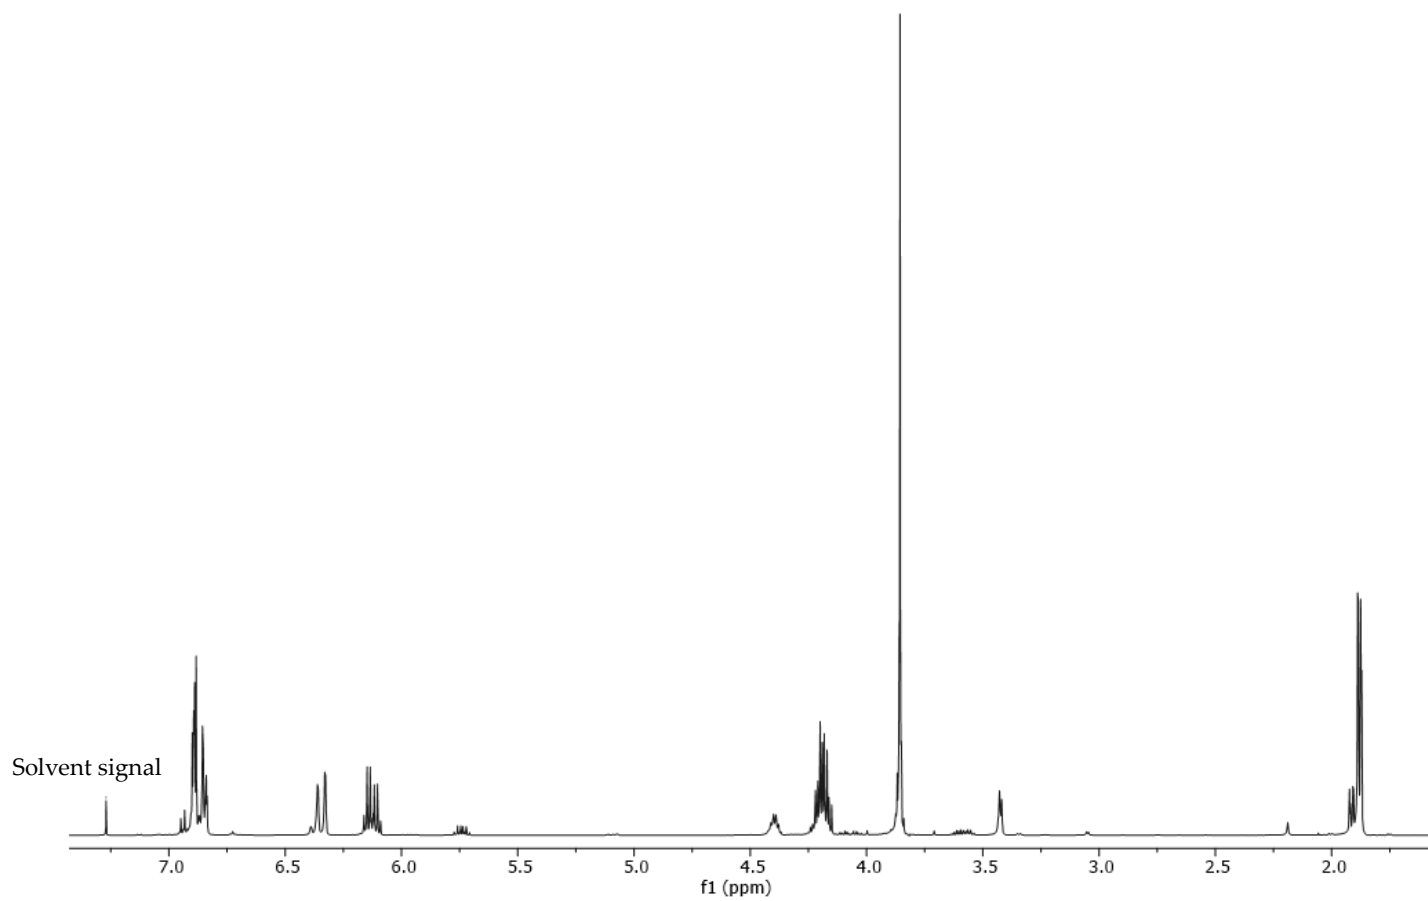

**Figure S3.**  $^1\text{H}$  NMR Spectrum of DiEP1 and DiEP2 ( $\text{CDCl}_3$ )

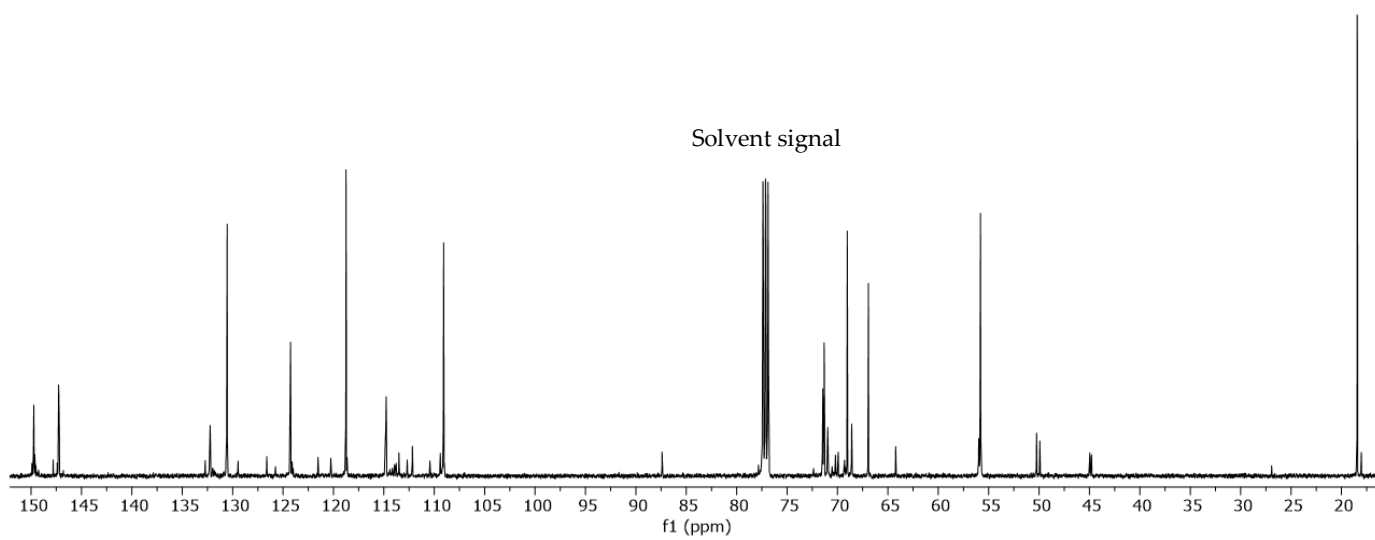

**Figure S4.**  $^{13}\text{C}\{^1\text{H}\}$  NMR Spectrum of DiEP1 and DiEP2 ( $\text{CDCl}_3$ )

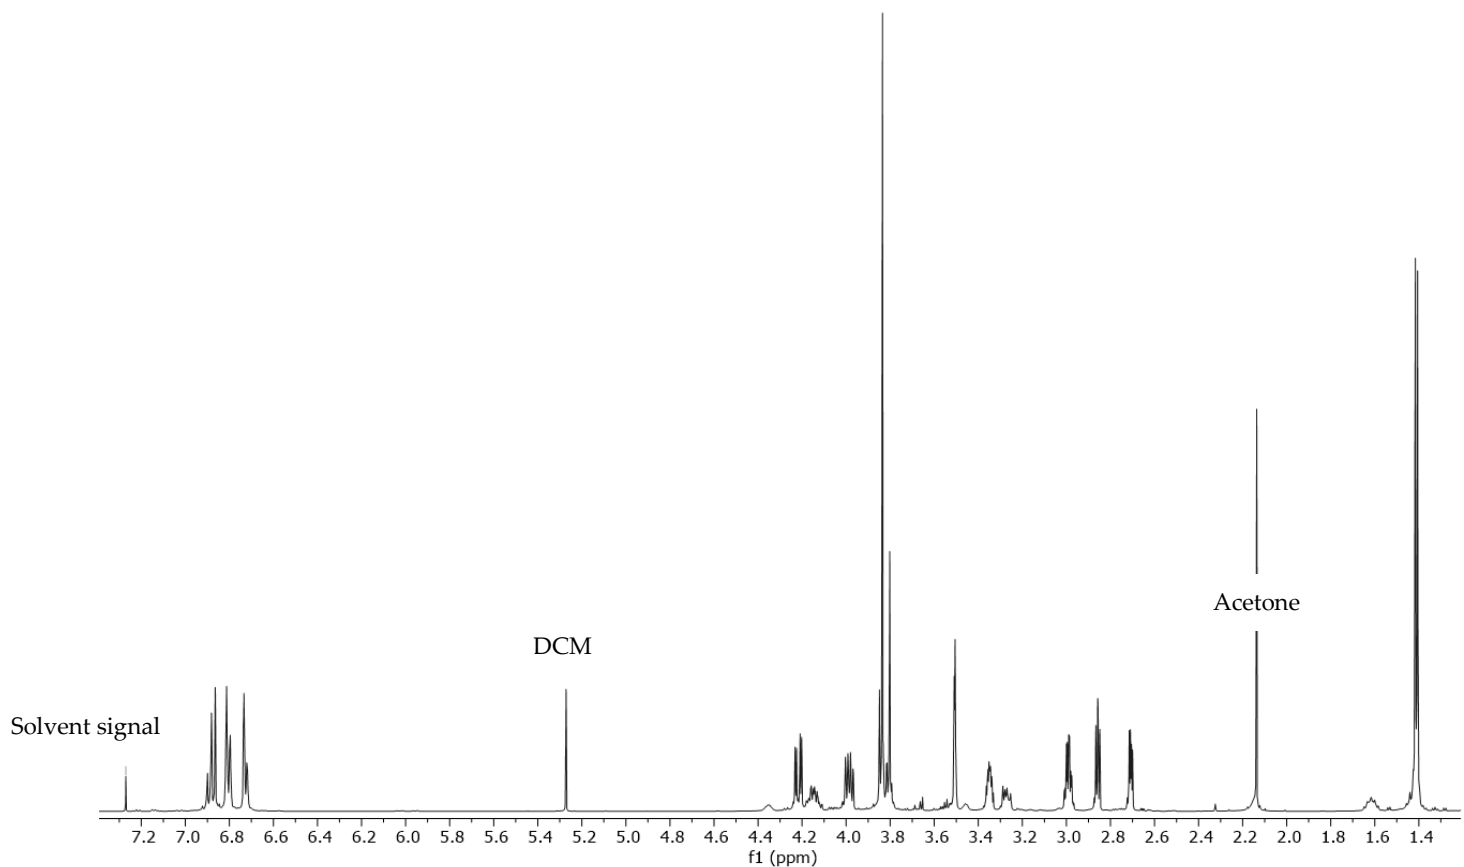

**Figure S5.** <sup>1</sup>H Spectrum of BioIgenox (CDCl<sub>3</sub>)

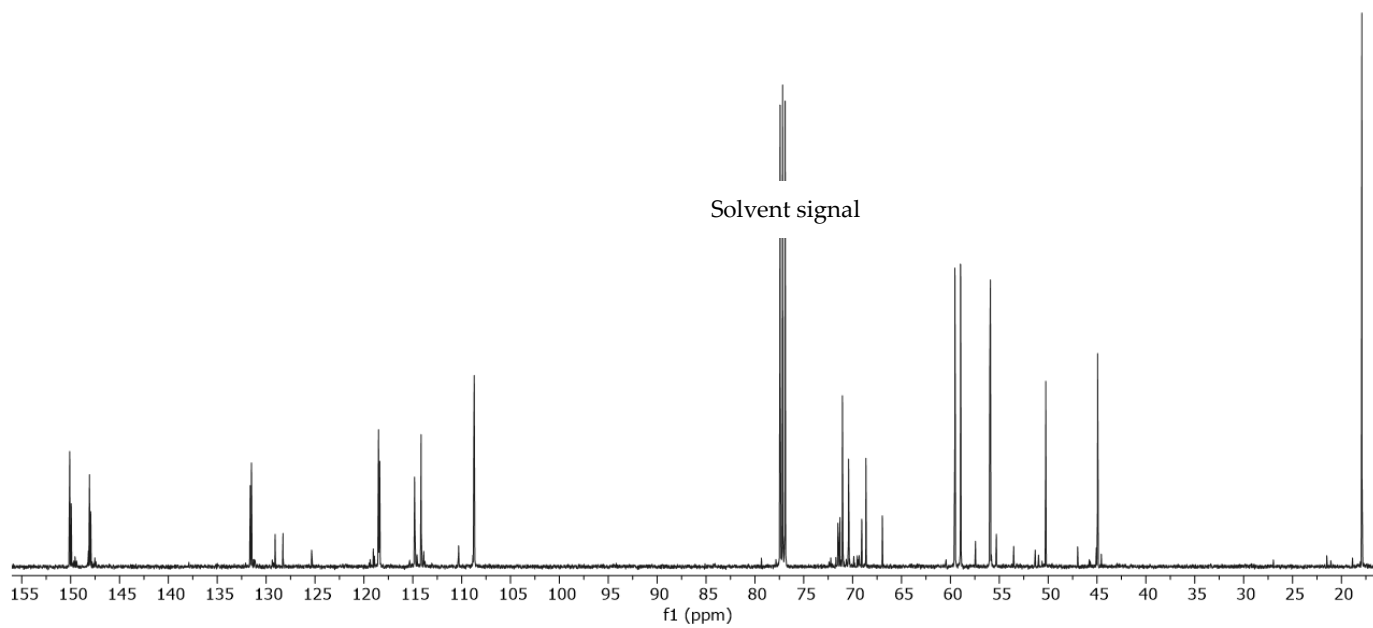

**Figure S6.** <sup>13</sup>C{<sup>1</sup>H} spectrum of BioIgenox (CDCl<sub>3</sub>)
